# Supplementary material
Source: MDPI journal article supplement (https://www.mdpi.com/2304-6740/12/5/132)
Supplement: s1 [file s1 › inorganics-2957559-supplementary.pdf]

## Supplementary Material

# Fluorosolvatochromism of Platinum Supramolecular Coordination Complexes: Stepwise Synthesis and Photophysical Properties of Organometallic Tetranuclear Pt(II) Squares

Antonia Garypidou <sup>1,\*</sup>, Konstantinos Ypsilantis <sup>1</sup> and Achilleas Garoufis <sup>1,2,\*</sup>

<sup>1</sup> Department of Chemistry, University of Ioannina, GR-45110 Ioannina, Greece; k\_ypsilantis@yahoo.gr

<sup>2</sup> Institute of Materials Science and Computing, University Research Centre of Ioannina (URCI), GR-45110 Ioannina, Greece

\* Correspondence: a.garypidou@uoi.gr (A.G.); agaroufi@uoi.gr (A.G.)

### TABLE OF CONTENTS

**Figure S1.** <sup>1</sup>HNMR of complex [Pt(COD)Cl]<sub>2</sub>(μ-terph) (**1**) in CD<sub>2</sub>Cl<sub>2</sub> in 500 MHz 298K.

**Figure S2.** Aromatic region of <sup>1</sup>HNMR of complex [Pt(2,2'-bpy)Cl]<sub>2</sub>(μ-terph) (**2**) in CD<sub>2</sub>Cl<sub>2</sub> in 500 MHz 298K.

**Figure S3.** Aromatic region of <sup>1</sup>H-<sup>1</sup>H COSY spectrum of complex [Pt(2,2'-bpy)Cl]<sub>2</sub>(μ-terph) (**2**) in CD<sub>2</sub>Cl<sub>2</sub> in 500 MHz 298 K with assignment cross-peaks.

**Figure S4.** Aromatic region of <sup>1</sup>H-<sup>1</sup>H ROESY spectrum of the complex (**2**) in CD<sub>2</sub>Cl<sub>2</sub> in 500 MHz 298 K with assignment cross-peaks.

**Figure S5.** HR-ESI MS spectrum of complex [Pt(2,2'-bpy)Cl]<sub>2</sub>(μ-terph) (**2**).

**Figure S6.** HR-ESI MS spectrum of complex {[Pt(2,2'-bpy)(CH<sub>3</sub>CN)]<sub>2</sub>(μ-terph)}(NO<sub>3</sub>)<sub>2</sub> (**3**).

**Figure S7.** Aromatic region of <sup>1</sup>H-<sup>1</sup>H COSY (a) and <sup>1</sup>H-<sup>1</sup>H TOCSY (b) spectra of complex {[Pt(2,2'-bpy)(CH<sub>3</sub>CN)]<sub>2</sub>(μ-terph)}(NO<sub>3</sub>)<sub>2</sub> (**3**) in DMSO-d<sub>6</sub> in 500 MHz 298 K with assignment cross-peaks.

**Figure S8.** Aromatic region of <sup>1</sup>H-<sup>1</sup>H COSY (a) and <sup>1</sup>H-<sup>1</sup>H TOCSY (b) spectra of complex {[Pt(2,2'-bpy)]<sub>4</sub>(μ-terph)<sub>2</sub>(μ-(4,4'-bpy)<sub>2</sub>)}{PF<sub>6</sub>}<sub>4</sub> (**7**) in DMSO-d<sub>6</sub> in 500 MHz 298 K with assignment cross-peaks.

**Figure S9.** Aromatic region of <sup>1</sup>H-<sup>1</sup>H ROESY spectra of the complex (**8**) (a) and (**9**) (b) in DMSO-d<sub>6</sub> at 298 K in 500 MHz with assignment at inter-ligand cross-peaks.

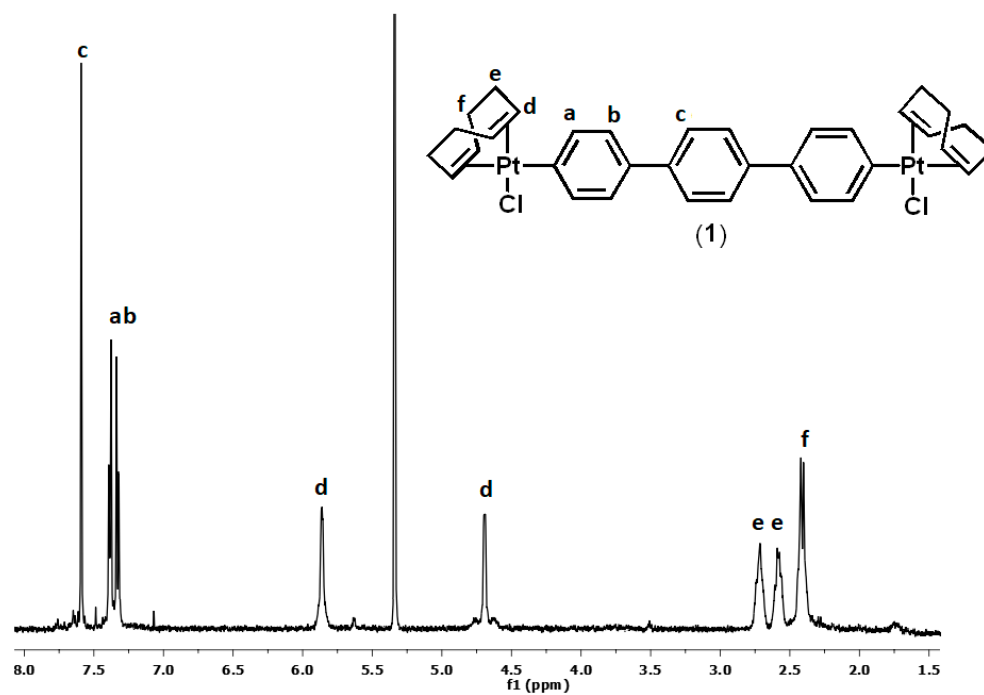

**Figure S1.**  $^1\text{H}$ NMR of complex  $[\text{Pt}(\text{COD})\text{Cl}]_2(\mu\text{-terph})$  (1) in  $\text{CD}_2\text{Cl}_2$  in 500 MHz 298K.

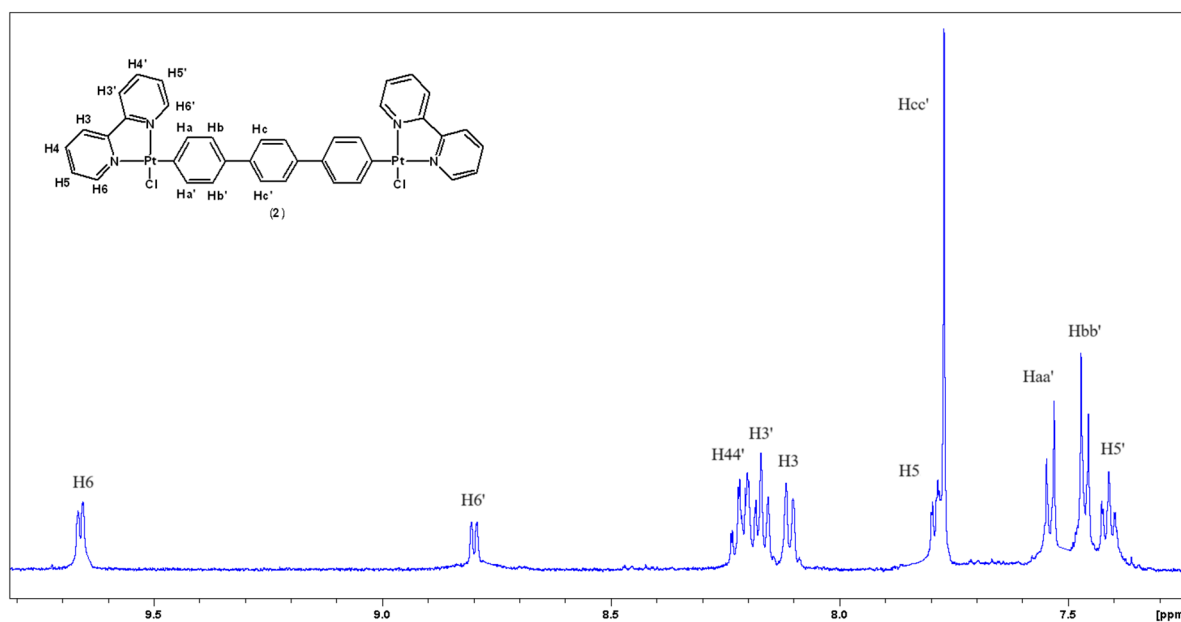

**Figure S2.** Aromatic region of  $^1\text{H}$ NMR of complex  $[\text{Pt}(2,2'\text{-bpy})\text{Cl}]_2(\mu\text{-terph})$  (2) in  $\text{CD}_2\text{Cl}_2$  in 500 MHz 298K.

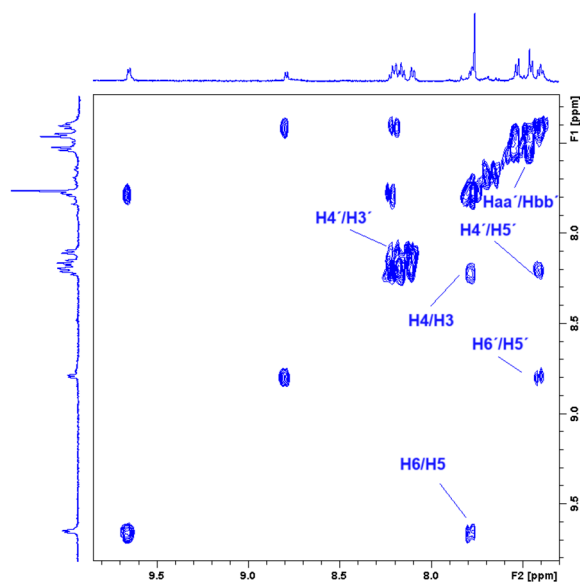

**Figure S3.** Aromatic region of  $^1\text{H}$ - $^1\text{H}$  COSY spectrum of complex  $[\text{Pt}(2,2'\text{-bpy})\text{Cl}]_2(\mu\text{-terph})$  (**2**) in  $\text{CD}_2\text{Cl}_2$  in 500 MHz 298 K with assignment cross-peaks.

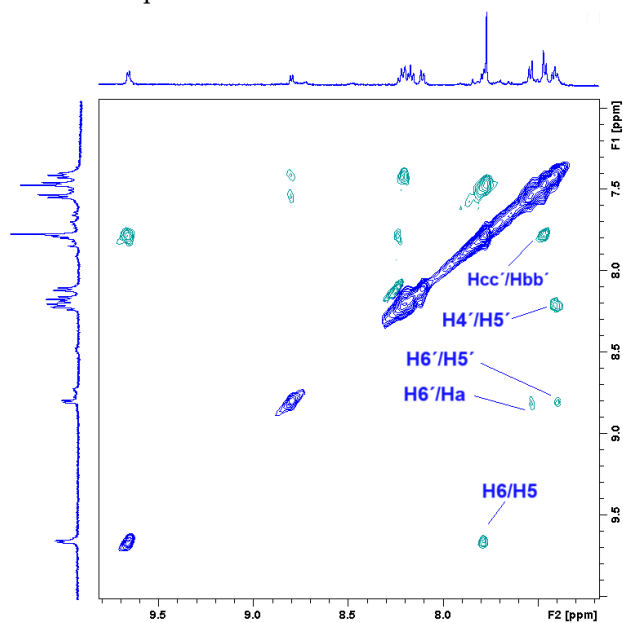

**Figure S4.** Aromatic region of ROESY spectrum of the complex (**2**) in  $\text{CD}_2\text{Cl}_2$  in 500 MHz 298 K with cross-peaks assignment.

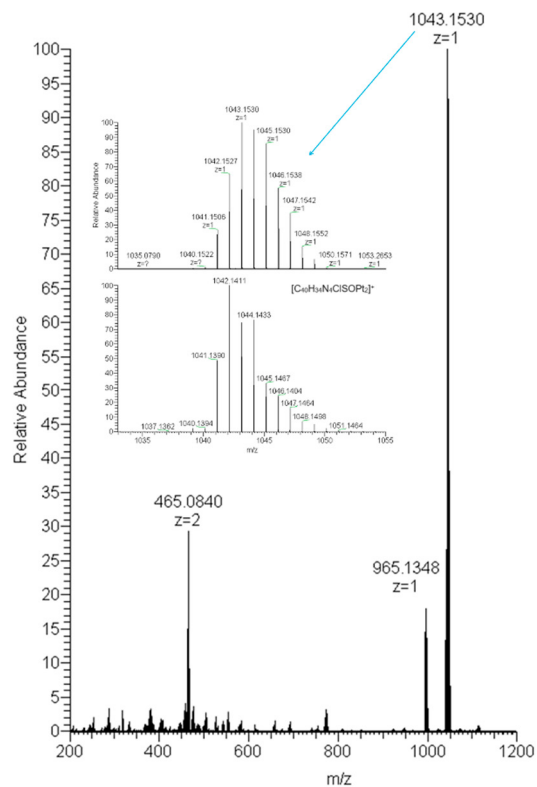

**Figure S5.** HR-ESI MS spectrum of complex  $[\text{Pt}(2,2'\text{-bpy})\text{Cl}]_2(\mu\text{-terph})$  (2).

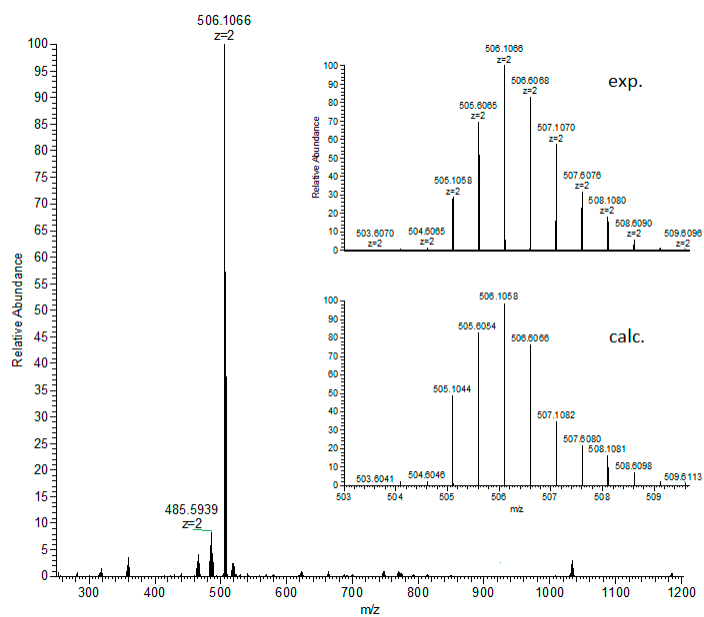

**Figure S6.** HR-ESI MS spectrum of complex  $\{[\text{Pt}(2,2'\text{-bpy})(\text{CH}_3\text{CN})]_2(\mu\text{-terph})\}(\text{NO}_3)_2$  (3).

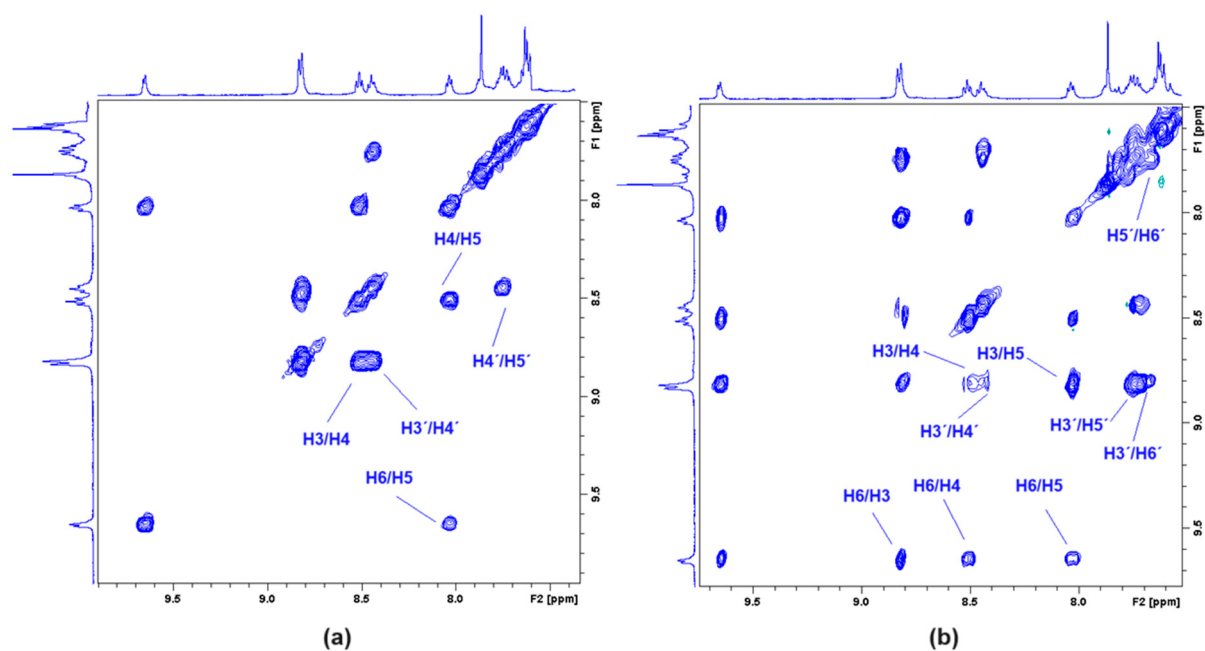

**Figure S7.** Aromatic region of  $^1\text{H}$ - $^1\text{H}$  COSY (a) and  $^1\text{H}$ - $^1\text{H}$  TOCSY (b) spectra of complex  $\{[\text{Pt}(2,2'\text{-bpy})(\text{CH}_3\text{CN})]_2(\mu\text{-terph})\}(\text{NO}_3)_2$  (**3**) in  $\text{DMSO-d}_6$  in 500 MHz 298 K with assignment cross-peaks.

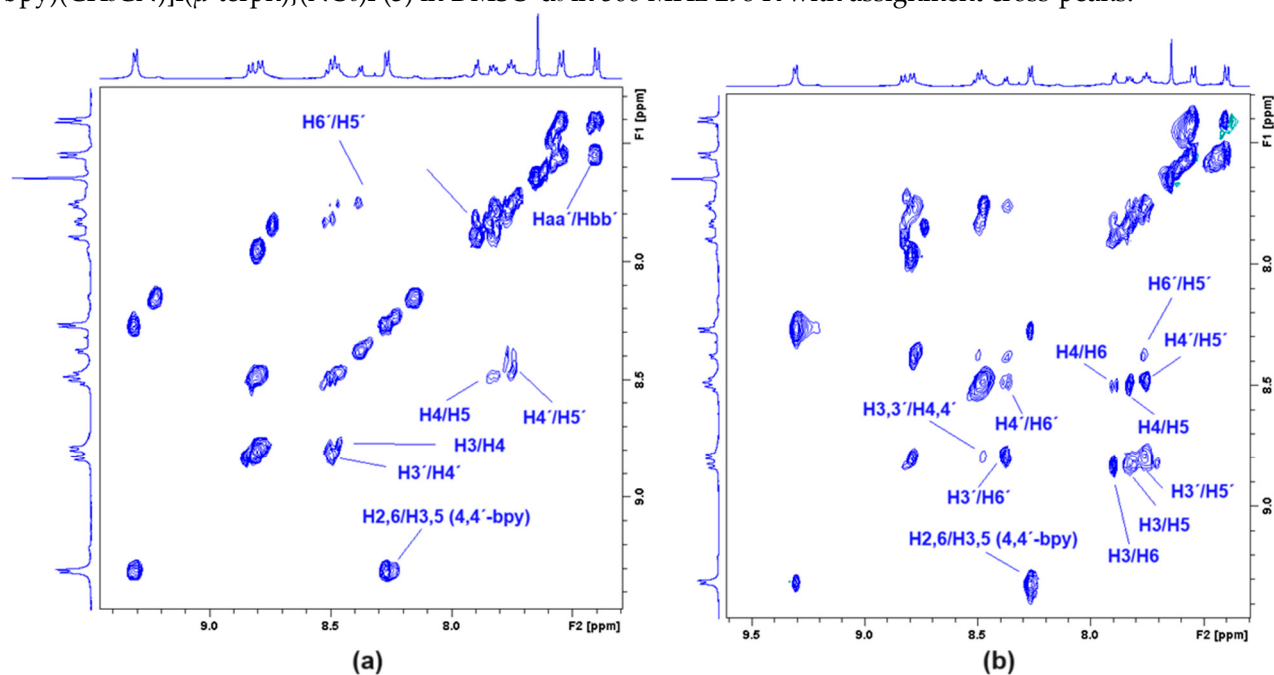

**Figure S8.** Aromatic region of  $^1\text{H}$ - $^1\text{H}$  COSY (a) and  $^1\text{H}$ - $^1\text{H}$  TOCSY (b) spectra of complex  $\{[\text{Pt}(2,2'\text{-bpy})]_4(\mu\text{-terph})_2(\mu\text{-(4,4'-bpy)}_2)\}(\text{PF}_6)_4$  (**7**) in  $\text{DMSO-d}_6$  in 500 MHz 298 K with assignment cross-peaks.

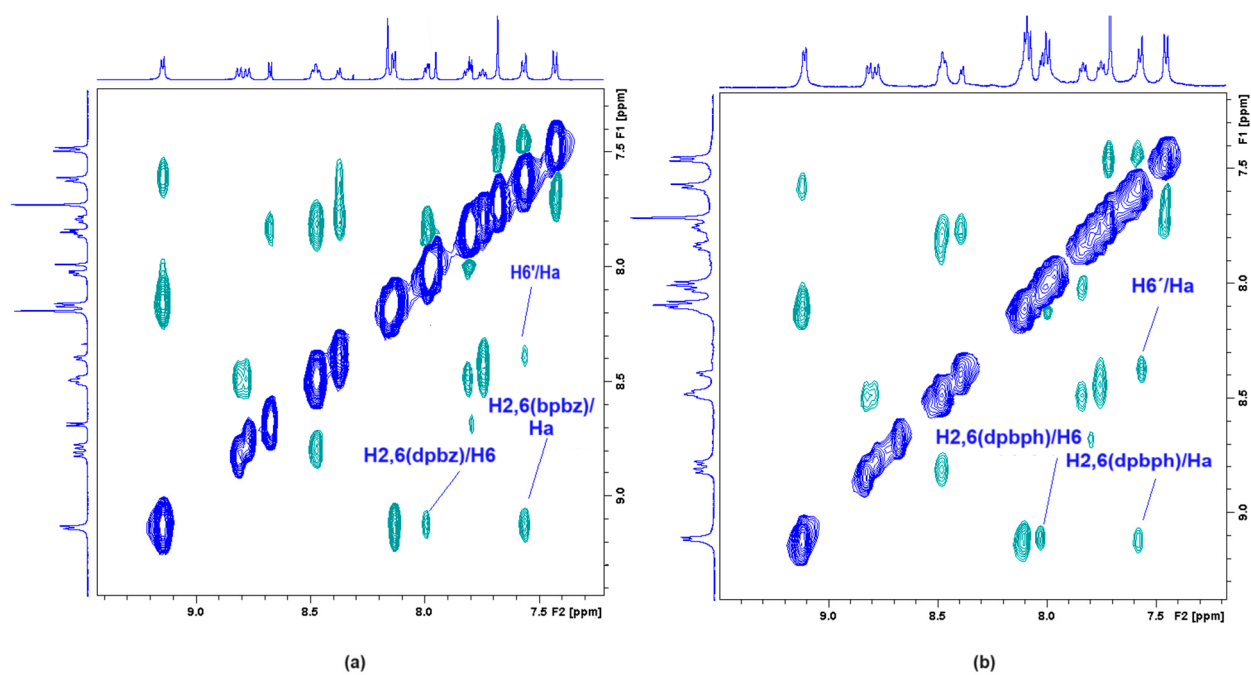

**Figure S9.** Aromatic region of  $^1\text{H}$ - $^1\text{H}$  ROESY spectra of the complex (8) (a) and (9) (b) in  $\text{DMSO-d}_6$  at 298 K in 500 MHz with assignment at inter-ligand cross-peaks.
